# Supplementary material for: Transcriptomic responses to biotic stresses in Malus x domestica: a meta-analysis study
Source: PubMed Central journal article supplement (PMC5792587; doi:10.1038/s41598-018-19348-4), 2018-01-31
Supplement: 41598_2018_19348_MOESM1_ESM.pdf [file 41598_2018_19348_MOESM1_ESM.pdf]

## **Supplementary information**

### **Transcriptomic responses to biotic stresses in *Malus x domestica*: a meta-analysis study**

Bipin Balan<sup>1</sup>, Franco Marra<sup>1</sup>, Tiziano Caruso<sup>1</sup>, Federico Martinelli<sup>1</sup>

<sup>1</sup>Dipartimento di Scienze Agrarie e Forestali, Università degli Studi di Palermo, Palermo,  
Italy

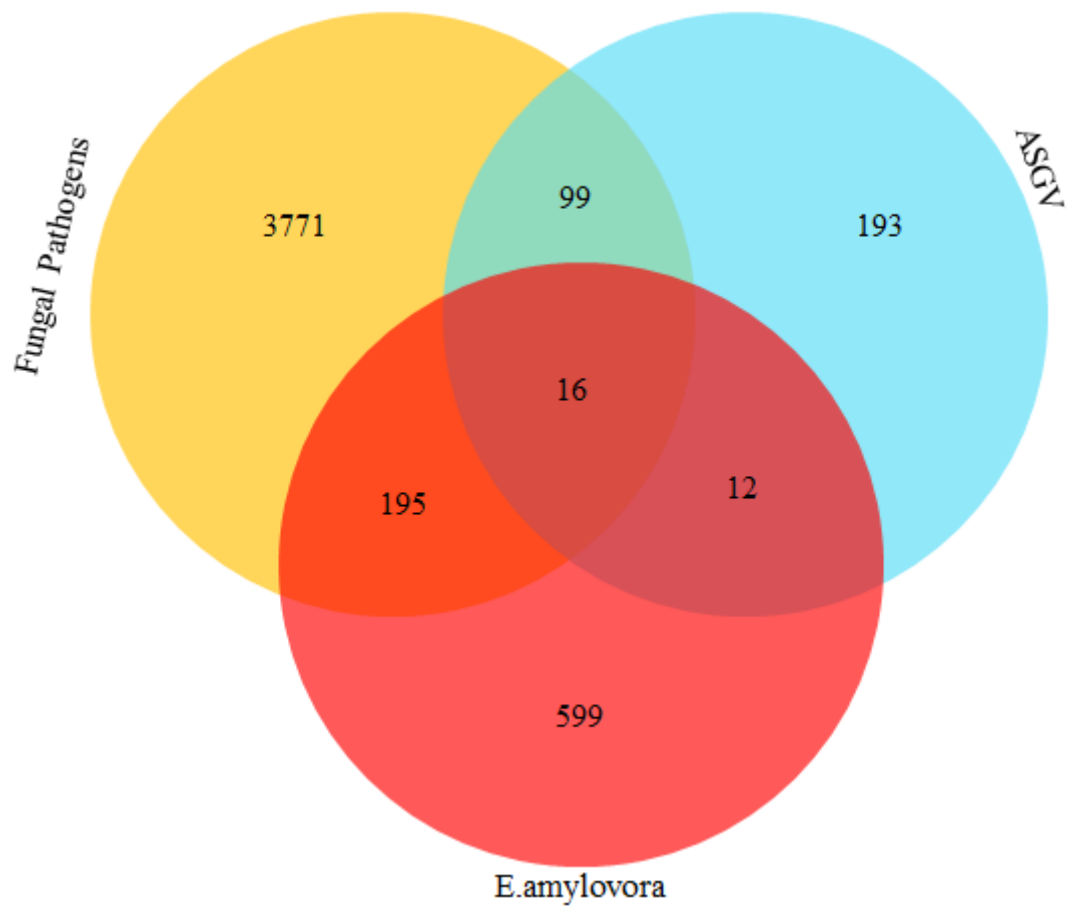

Figure S1. Venn diagram showing the number of specifically and commonly regulated genes for each biotic stresses: Fungal Pathogens, Apple stem grooving virus (ASGV) and Erwinia amylovora (E. amylovora).

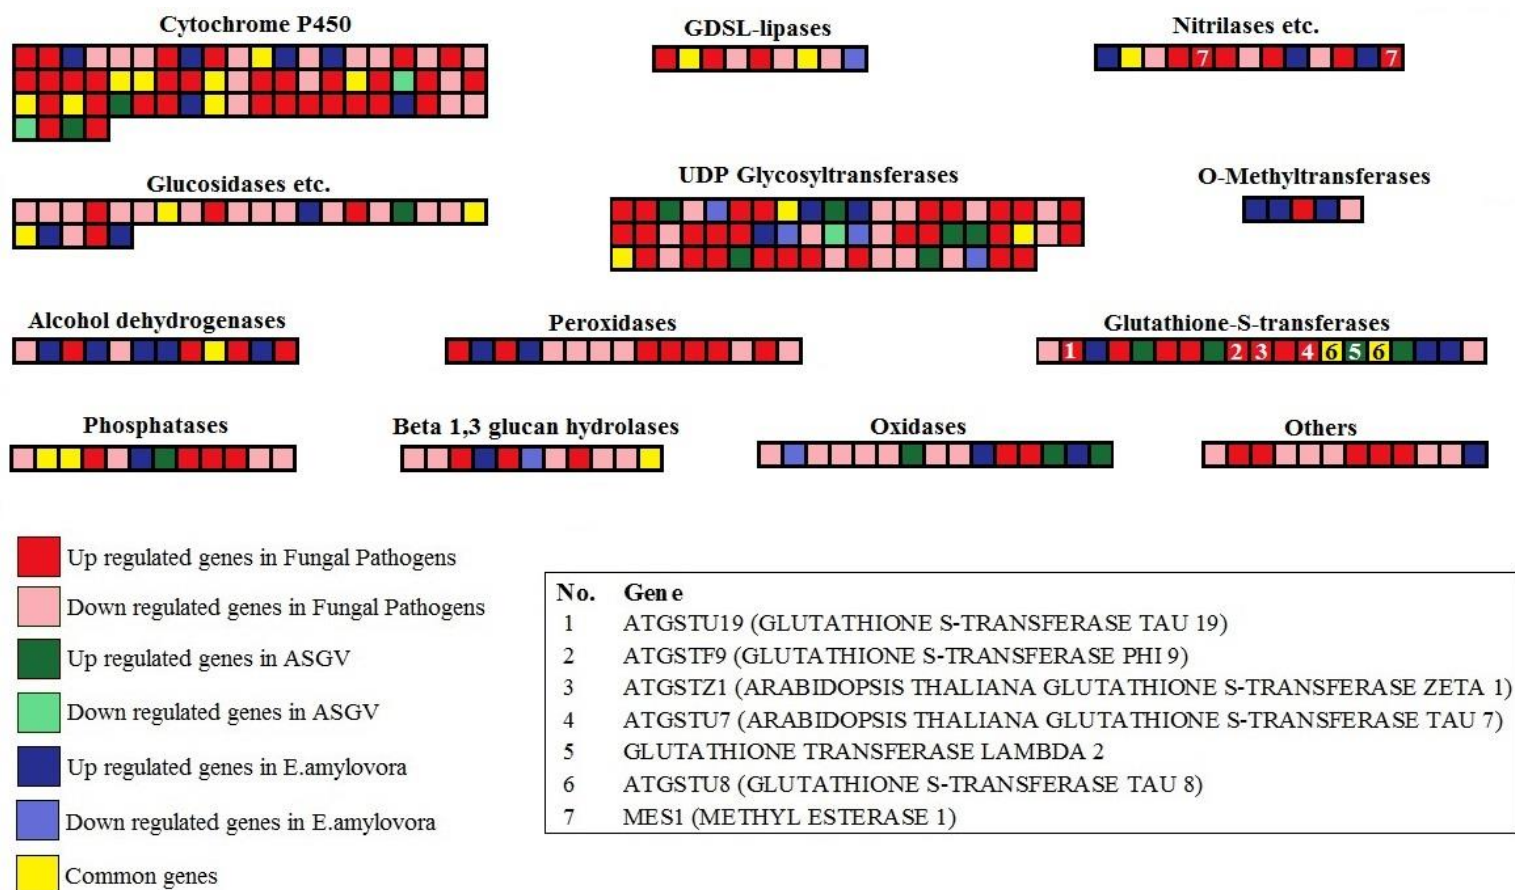

Figure S2. Genes involved in detoxifying pathways and encoding enzymes belonging to different large families. The key genes explained in the manuscript were highlighted in the figure.

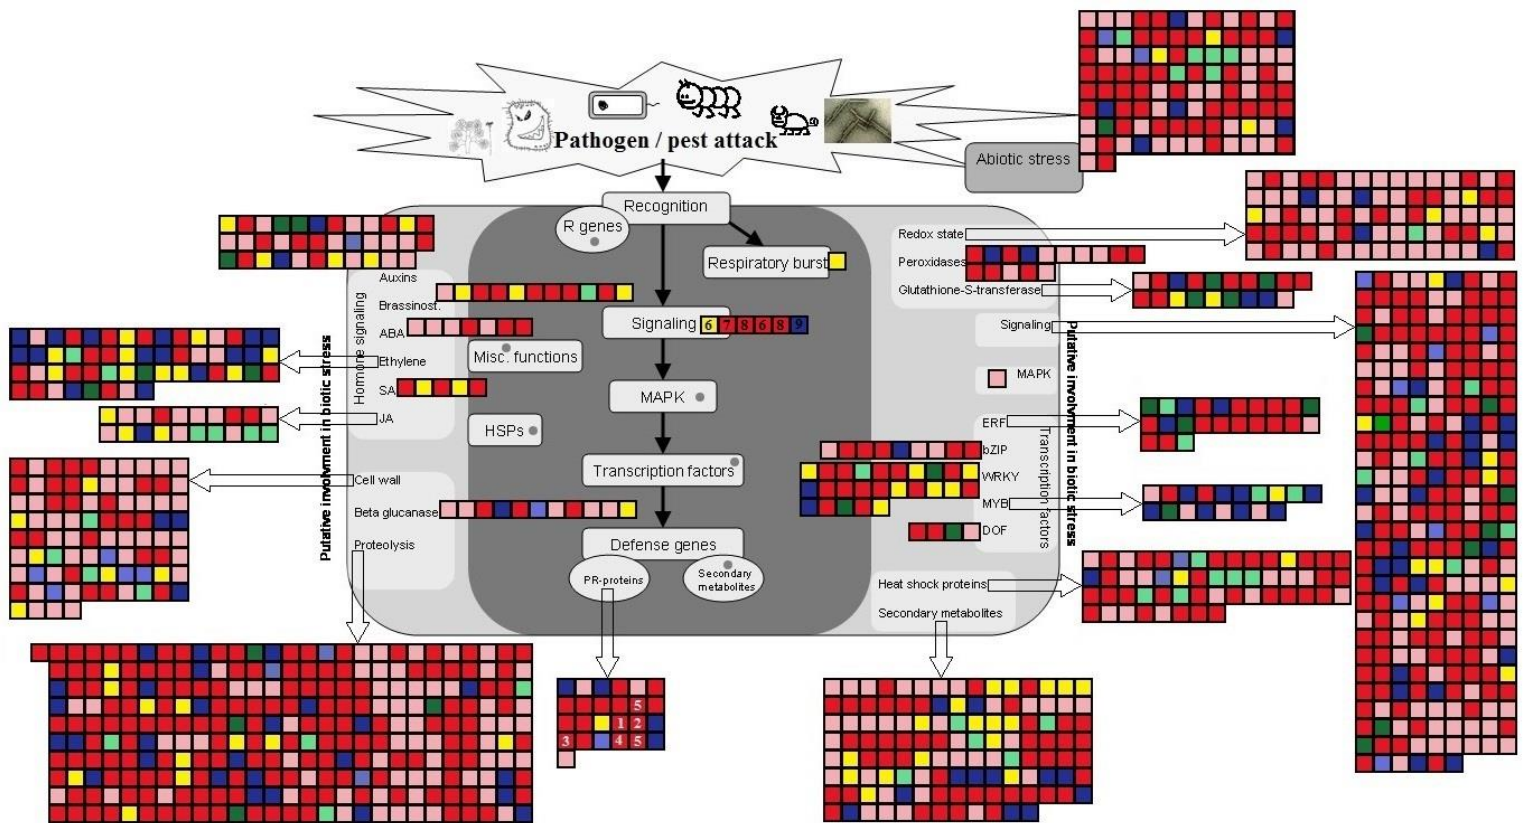

- Up regulated genes in Fungal Pathogens
- Down regulated genes in Fungal Pathogens
- Up regulated genes in ASGV
- Down regulated genes in ASGV
- Up regulated genes in E.amylovora
- Down regulated genes in E.amylovora
- Common genes

| No. | Gene                                                               |
|-----|--------------------------------------------------------------------|
| 1   | disease resistance protein (TIR class), putative                   |
| 2   | disease resistance protein (CC-NBS-LRR class), putative            |
| 3   | ADR1-L1 (ADR1-like 1); ATP binding / protein binding               |
| 4   | RPP1 (recognition of peronospora parasitica 1); LRR domain binding |
| 5   | ATP binding / protein binding / transmembrane receptor             |
| 6   | MLO6 (MILDEW RESISTANCE LOCUS O 6); calmodulin binding             |
| 7   | MLO3 (MILDEW RESISTANCE LOCUS O 3)                                 |
| 8   | MLO1; calmodulin binding                                           |
| 9   | MLO12 (MILDEW RESISTANCE LOCUS O 12)                               |

Figure S3. Biotic stress mapman overview showing genes differentially expressed in the 7 transcriptomic articles and divided in three types of stresses and 7 categories depending on their trend of expression. The key genes explained in the manuscript were indicated in the figure.
